# Supplementary material for: Insights into the Effect of Lithium Doping on the Deep Eutectic Solvent Choline Chloride:Urea
Source: MDPI journal article supplement (doi:10.3390/ma15217459), 2022-10-24
Supplement: s1 [file s1]

# Electronic Supporting Information for:

## Insights into the effect of lithium doping on the deep eutectic solvent choline chloride: urea

Giselle de Araujo Lima e Souza <sup>1</sup>, Maria Enrica Di Pietro <sup>1,\*</sup>, Franca Castiglione <sup>1</sup>, Valeria Vanoli <sup>1</sup>, Andrea Mele <sup>1,2,\*</sup>

<sup>1</sup> Department of Chemistry, Materials and Chemical Engineering “G. Natta”, Politecnico di Milano, Piazza L. da Vinci 32, 20133 Milano, Italy

<sup>2</sup> CNR-SCITEC Istituto di Scienze e Tecnologie Chimiche, Via A. Corti 12, 20133 Milano, Italy

\* Correspondence: mariaenrica.dipietro@polimi.it (M.E.D.P.); andrea.mele@polimi.it (A.M.)

**Table S1.** The main types of DESs [1,2].

| Type | General composition                                  | Example                                                  |
|------|------------------------------------------------------|----------------------------------------------------------|
| I    | Metal salt + organic salt                            | $\text{ZnCl}_2 + \text{ChCl}$                            |
| II   | Metal salt hydrate + organic salt                    | $\text{CoCl}_2 \cdot 6 \text{H}_2\text{O} + \text{ChCl}$ |
| III  | Organic salt + Hydrogen Bond Donor                   | $\text{ChCl} + \text{U}$                                 |
| IV   | Metal salt (hydrate) + Hydrogen Bond Donor           | $\text{ZnCl}_2 + \text{U}$                               |
| V    | Molecular non-ionic Hydrogen Bond Donor and Acceptor | thymol + menthol                                         |

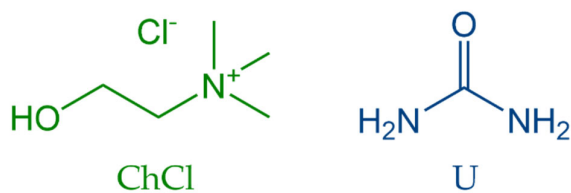**Figure S1.** Chemical structure of choline chloride (ChCl) and urea (U).

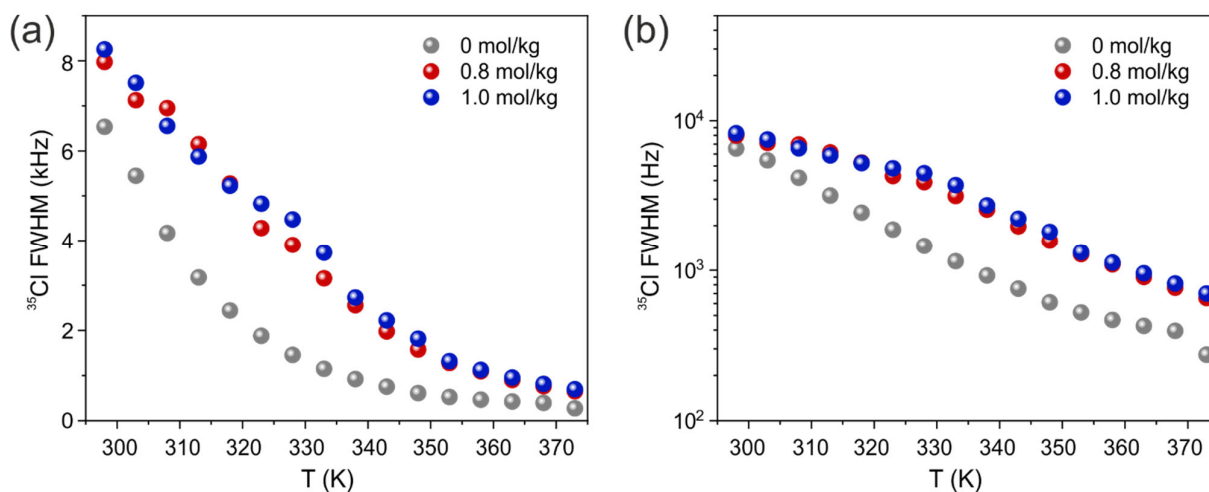

**Figure S2.**  $^{35}\text{Cl}$  NMR (a) linear and (b) log-scaled full width at half maximum (FWHM) of ChCl:U-LiCl(0) (grey), ChCl:U-LiCl(0.8) (red), and ChCl:U-LiCl(1.0) (blue), as a function of temperature.

**Table S2.** Temperature-dependent  $^1\text{H}$  and  $^7\text{Li}$  self-diffusion coefficients  $D$  (in  $\text{m}^2\text{s}^{-1}$ ) measured for ChCl:U-LiCl(0), ChCl:U-LiCl(0.8) and ChCl:U-LiCl(1.0). Maximum errors are estimated to be 3% for  $^1\text{H}$  and 5% for  $^7\text{Li}$ .

| T (K) | ChCl:U-LiCl(0)        |                       | ChCl:U-LiCl(0.8)      |                       |                       | ChCl:U-LiCl(1.0)      |                       |                       |
|-------|-----------------------|-----------------------|-----------------------|-----------------------|-----------------------|-----------------------|-----------------------|-----------------------|
|       | U                     | Ch                    | U                     | Ch                    | Li                    | U                     | Ch                    | Li                    |
| 298   | $3.03 \cdot 10^{-12}$ | $2.44 \cdot 10^{-12}$ | $1.20 \cdot 10^{-12}$ | $1.08 \cdot 10^{-12}$ |                       | $1.02 \cdot 10^{-12}$ | $8.20 \cdot 10^{-13}$ |                       |
| 303   | $5.00 \cdot 10^{-12}$ | $3.72 \cdot 10^{-12}$ | $1.80 \cdot 10^{-12}$ | $1.55 \cdot 10^{-12}$ |                       | $1.70 \cdot 10^{-12}$ | $1.10 \cdot 10^{-12}$ |                       |
| 308   | $7.04 \cdot 10^{-12}$ | $4.74 \cdot 10^{-12}$ | $2.69 \cdot 10^{-12}$ | $2.17 \cdot 10^{-12}$ |                       | $2.20 \cdot 10^{-12}$ | $1.50 \cdot 10^{-12}$ |                       |
| 313   | $1.01 \cdot 10^{-11}$ | $6.24 \cdot 10^{-12}$ | $3.97 \cdot 10^{-12}$ | $2.97 \cdot 10^{-12}$ |                       | $2.80 \cdot 10^{-12}$ | $2.00 \cdot 10^{-12}$ |                       |
| 318   | $1.44 \cdot 10^{-11}$ | $8.27 \cdot 10^{-12}$ | $5.72 \cdot 10^{-12}$ | $3.96 \cdot 10^{-12}$ | $2.44 \cdot 10^{-12}$ | $4.30 \cdot 10^{-12}$ | $2.90 \cdot 10^{-12}$ | $1.84 \cdot 10^{-12}$ |
| 323   | $1.98 \cdot 10^{-11}$ | $1.10 \cdot 10^{-11}$ | $8.21 \cdot 10^{-12}$ | $5.29 \cdot 10^{-12}$ | $3.42 \cdot 10^{-12}$ | $6.00 \cdot 10^{-12}$ | $4.10 \cdot 10^{-12}$ | $2.76 \cdot 10^{-12}$ |
| 328   | $2.66 \cdot 10^{-11}$ | $1.45 \cdot 10^{-11}$ | $1.13 \cdot 10^{-11}$ | $6.85 \cdot 10^{-12}$ | $3.93 \cdot 10^{-12}$ | $7.37 \cdot 10^{-12}$ | $5.10 \cdot 10^{-12}$ | $3.27 \cdot 10^{-12}$ |
| 333   | $3.46 \cdot 10^{-11}$ | $1.87 \cdot 10^{-11}$ | $1.32 \cdot 10^{-11}$ | $8.11 \cdot 10^{-12}$ | $5.40 \cdot 10^{-12}$ | $1.07 \cdot 10^{-11}$ | $6.98 \cdot 10^{-12}$ | $4.66 \cdot 10^{-12}$ |
| 338   | $4.42 \cdot 10^{-11}$ | $2.39 \cdot 10^{-11}$ | $1.90 \cdot 10^{-11}$ | $1.12 \cdot 10^{-11}$ | $7.70 \cdot 10^{-12}$ | $1.54 \cdot 10^{-11}$ | $9.39 \cdot 10^{-12}$ | $6.87 \cdot 10^{-12}$ |
| 343   | $5.47 \cdot 10^{-11}$ | $2.98 \cdot 10^{-11}$ | $2.51 \cdot 10^{-11}$ | $1.44 \cdot 10^{-11}$ | $1.01 \cdot 10^{-11}$ | $2.01 \cdot 10^{-11}$ | $1.20 \cdot 10^{-11}$ | $8.82 \cdot 10^{-12}$ |
| 348   | $7.24 \cdot 10^{-11}$ | $3.83 \cdot 10^{-11}$ | $3.20 \cdot 10^{-11}$ | $1.83 \cdot 10^{-11}$ | $1.29 \cdot 10^{-11}$ | $2.63 \cdot 10^{-11}$ | $1.56 \cdot 10^{-11}$ | $1.17 \cdot 10^{-11}$ |
| 353   | $8.52 \cdot 10^{-11}$ | $4.63 \cdot 10^{-11}$ | $4.10 \cdot 10^{-11}$ | $2.37 \cdot 10^{-11}$ | $1.70 \cdot 10^{-11}$ | $3.80 \cdot 10^{-11}$ | $2.23 \cdot 10^{-11}$ | $1.71 \cdot 10^{-11}$ |
| 358   | $9.87 \cdot 10^{-11}$ | $5.45 \cdot 10^{-11}$ | $5.04 \cdot 10^{-11}$ | $2.91 \cdot 10^{-11}$ | $2.12 \cdot 10^{-11}$ | $4.79 \cdot 10^{-11}$ | $2.76 \cdot 10^{-11}$ | $2.04 \cdot 10^{-11}$ |
| 363   | $1.18 \cdot 10^{-10}$ | $6.49 \cdot 10^{-11}$ | $6.24 \cdot 10^{-11}$ | $3.63 \cdot 10^{-11}$ | $2.77 \cdot 10^{-11}$ | $5.80 \cdot 10^{-11}$ | $3.37 \cdot 10^{-11}$ | $2.51 \cdot 10^{-11}$ |
| 368   | $1.36 \cdot 10^{-10}$ | $7.54 \cdot 10^{-11}$ | $7.72 \cdot 10^{-11}$ | $4.70 \cdot 10^{-11}$ | $3.97 \cdot 10^{-11}$ | $6.98 \cdot 10^{-11}$ | $4.06 \cdot 10^{-11}$ | $3.03 \cdot 10^{-11}$ |
| 373   | $1.58 \cdot 10^{-10}$ | $8.92 \cdot 10^{-11}$ | $9.26 \cdot 10^{-11}$ | $5.60 \cdot 10^{-11}$ | $4.43 \cdot 10^{-11}$ | $8.37 \cdot 10^{-11}$ | $4.83 \cdot 10^{-11}$ | $3.65 \cdot 10^{-11}$ |

**Table S3.** Parameters obtained from the linear fit of the Arrhenius plot of the diffusion data in the whole temperature range (298–373 K for  $^1\text{H}$ , 318–373 K for  $^7\text{Li}$ ).

| Sample           | Species | $\ln A \text{ (m}^2\text{s}^{-1}\text{)}$ | $E_a^{\text{transl}} \text{ (kJmol}^{-1}\text{)}$ | $R^2$ |
|------------------|---------|-------------------------------------------|---------------------------------------------------|-------|
| ChCl:U–LiCl(0)   | U       | -6.8445                                   | 48.1                                              | 0.990 |
|                  | Ch      | -8.732                                    | 44.3                                              | 0.998 |
| ChCl:U–LiCl(0.8) | U       | -5.7644                                   | 53.4                                              | 0.996 |
|                  | Ch      | -8.0666                                   | 48.1                                              | 0.999 |
|                  | Li      | -6.6553                                   | 53.2                                              | 0.997 |
| ChCl:U–LiCl(1.0) | U       | -5.3153                                   | 55.1                                              | 0.998 |
|                  | Ch      | -6.9686                                   | 51.8                                              | 0.999 |
|                  | Li      | -6.2722                                   | 54.7                                              | 0.995 |

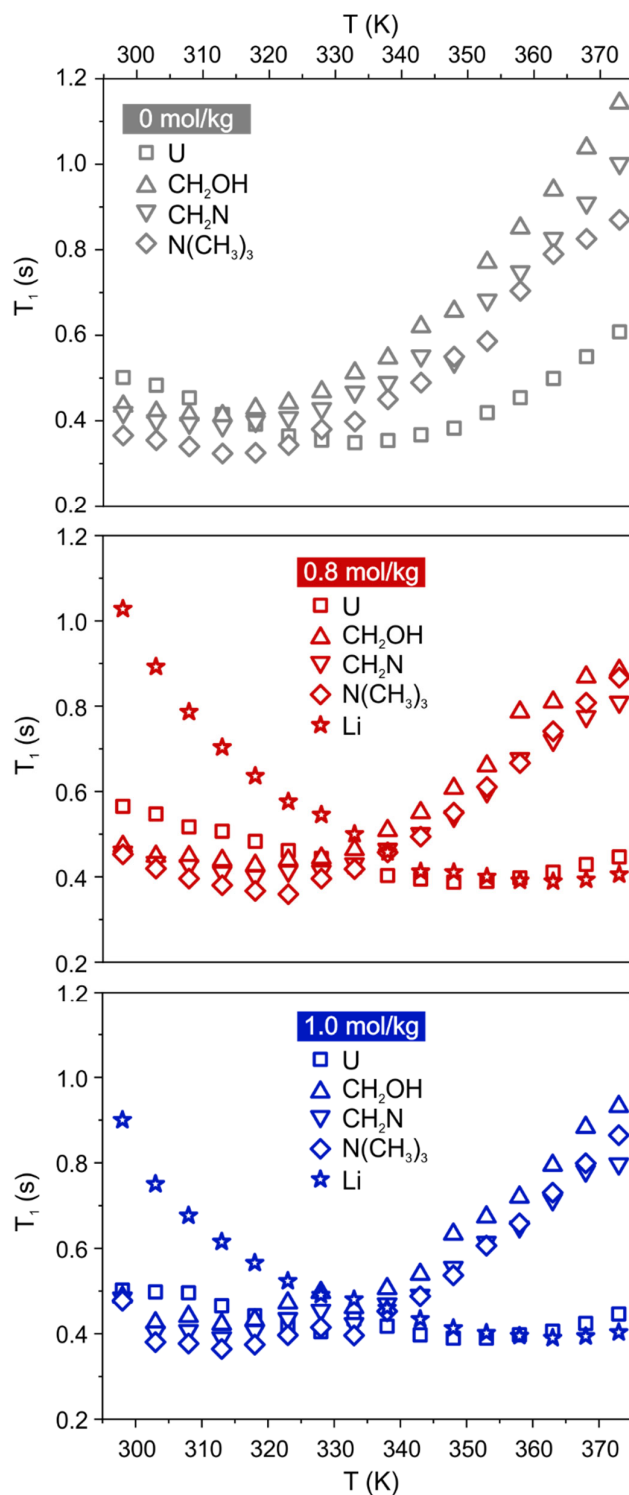

**Figure S3.**  $^1\text{H}$  and  $^7\text{Li}$   $T_1$  relaxation times of ChCl:U-LiCl(0) (top, grey), ChCl:U-LiCl(0.8) (middle, red), and ChCl:U-LiCl(1.0) (bottom, blue), as a function of temperature. Maximum errors are estimated to be 3%.

**Table S4.** Best-fit parameters obtained for all proton and lithium nuclei using the BPP model. Maximum errors are estimated to be 15% for  $\tau_0$ , 5% for  $E_a^{rot}$ , 2% for  $C$ .

| Site                             | ChCl:U–LiCl(0)                       |                                       |                      | ChCl:U–LiCl(0.8)                     |                                       |                      | ChCl:U–LiCl(1.0)                  |                                       |                      |
|----------------------------------|--------------------------------------|---------------------------------------|----------------------|--------------------------------------|---------------------------------------|----------------------|-----------------------------------|---------------------------------------|----------------------|
|                                  | $C$ [ $10^9$ ]<br>(s <sup>-2</sup> ) | $E_a^{rot}$<br>(kJmol <sup>-1</sup> ) | $\tau_0$ (s)         | $C$ [ $10^9$ ]<br>(s <sup>-2</sup> ) | $E_a^{rot}$<br>(kJmol <sup>-1</sup> ) | $\tau_0$ (s)         | $C$ [ $10^9$ ] (s <sup>-2</sup> ) | $E_a^{rot}$<br>(kJmol <sup>-1</sup> ) | $\tau_0$ (s)         |
| U <sup>a</sup>                   | 6.3                                  | 30.6                                  | $3.0 \cdot 10^{-15}$ | 5.6                                  | 28.4                                  | $3.0 \cdot 10^{-14}$ | -                                 | -                                     | -                    |
| U <sup>b</sup>                   | 6.3                                  | 31.1                                  | $2.5 \cdot 10^{-15}$ | 5.7                                  | 28.9                                  | $9.9 \cdot 10^{-15}$ | 5.7                               | 27.2                                  | $1.7 \cdot 10^{-14}$ |
| CH <sub>2</sub> OH               | 5.4                                  | 26.8                                  | $5.9 \cdot 10^{-15}$ | 5.2                                  | 25.6                                  | $1.1 \cdot 10^{-14}$ | 5.1                               | 24.1                                  | $1.9 \cdot 10^{-14}$ |
| CH <sub>2</sub> N                | 5.7                                  | 26.4                                  | $7.5 \cdot 10^{-15}$ | 5.5                                  | 25.5                                  | $1.2 \cdot 10^{-14}$ | 5.4                               | 24.2                                  | $1.9 \cdot 10^{-14}$ |
| N(CH <sub>3</sub> ) <sub>3</sub> | 6.7                                  | 28.7                                  | $3.1 \cdot 10^{-15}$ | 5.9                                  | 29.0                                  | $3.3 \cdot 10^{-15}$ | 5.9                               | 27.7                                  | $5.2 \cdot 10^{-15}$ |
| Li                               | -                                    | -                                     | -                    | 2.2                                  | 24.2                                  | $1.7 \cdot 10^{-13}$ | 2.2                               | 20.0                                  | $6.9 \cdot 10^{-13}$ |

<sup>a</sup> T<sub>1</sub> curves fitted in the range 308–373 K and 323–373 K for samples ChCl:U–LiCl(0) and ChCl:U–LiCl(0.8), respectively.

<sup>b</sup> T<sub>1</sub> curves fitted in the range 333–373 K for all samples.

**Table S5.**  $^1\text{H}$  rotational correlation times  $\tau_c$  (s) calculated for  $\text{ChCl}:\text{U-LiCl}(0)$  using the BPP model.

| T (K) | $\text{U}^*$          | $\text{CH}_2\text{OH}$ | $\text{CH}_2\text{N}$ | $\text{N}(\text{CH}_3)_3$ |
|-------|-----------------------|------------------------|-----------------------|---------------------------|
| 298   | -                     | $2.94 \cdot 10^{-10}$  | $3.14 \cdot 10^{-10}$ | $3.33 \cdot 10^{-10}$     |
| 303   | -                     | $2.46 \cdot 10^{-10}$  | $2.64 \cdot 10^{-10}$ | $2.75 \cdot 10^{-10}$     |
| 308   | $4.66 \cdot 10^{-10}$ | $2.07 \cdot 10^{-10}$  | $2.23 \cdot 10^{-10}$ | $2.29 \cdot 10^{-10}$     |
| 313   | $3.85 \cdot 10^{-10}$ | $1.75 \cdot 10^{-10}$  | $1.89 \cdot 10^{-10}$ | $1.91 \cdot 10^{-10}$     |
| 318   | $3.20 \cdot 10^{-10}$ | $1.49 \cdot 10^{-10}$  | $1.61 \cdot 10^{-10}$ | $1.61 \cdot 10^{-10}$     |
| 323   | $2.67 \cdot 10^{-10}$ | $1.27 \cdot 10^{-10}$  | $1.38 \cdot 10^{-10}$ | $1.36 \cdot 10^{-10}$     |
| 328   | $2.25 \cdot 10^{-10}$ | $1.09 \cdot 10^{-10}$  | $1.19 \cdot 10^{-10}$ | $1.15 \cdot 10^{-10}$     |
| 333   | $1.90 \cdot 10^{-10}$ | $9.42 \cdot 10^{-11}$  | $1.03 \cdot 10^{-10}$ | $9.84 \cdot 10^{-11}$     |
| 338   | $1.61 \cdot 10^{-10}$ | $8.17 \cdot 10^{-11}$  | $8.92 \cdot 10^{-11}$ | $8.44 \cdot 10^{-11}$     |
| 343   | $1.38 \cdot 10^{-10}$ | $7.11 \cdot 10^{-11}$  | $7.78 \cdot 10^{-11}$ | $7.27 \cdot 10^{-11}$     |
| 348   | $1.18 \cdot 10^{-10}$ | $6.21 \cdot 10^{-11}$  | $6.81 \cdot 10^{-11}$ | $6.29 \cdot 10^{-11}$     |
| 353   | $1.02 \cdot 10^{-10}$ | $5.45 \cdot 10^{-11}$  | $5.99 \cdot 10^{-11}$ | $5.46 \cdot 10^{-11}$     |
| 358   | $8.78 \cdot 10^{-11}$ | $4.79 \cdot 10^{-11}$  | $5.28 \cdot 10^{-11}$ | $4.77 \cdot 10^{-11}$     |
| 363   | $7.62 \cdot 10^{-11}$ | $4.23 \cdot 10^{-11}$  | $4.68 \cdot 10^{-11}$ | $4.17 \cdot 10^{-11}$     |
| 368   | $6.64 \cdot 10^{-11}$ | $3.75 \cdot 10^{-11}$  | $4.15 \cdot 10^{-11}$ | $3.67 \cdot 10^{-11}$     |
| 373   | $5.81 \cdot 10^{-11}$ | $3.34 \cdot 10^{-11}$  | $3.70 \cdot 10^{-11}$ | $3.23 \cdot 10^{-11}$     |

\*  $T_1$  curve fitted in the range 308–373 K.

**Table S6.**  $^1\text{H}$  and  $^7\text{Li}$  rotational correlation times  $\tau_c$  (s) calculated for  $\text{ChCl:U-LiCl}(0.8)$  using the BPP model.

| T (K) | $\text{U}^*$          | $\text{CH}_2\text{OH}$ | $\text{CH}_2\text{N}$ | $\text{N}(\text{CH}_3)_3$ | Li                    |
|-------|-----------------------|------------------------|-----------------------|---------------------------|-----------------------|
| 298   |                       | $3.41 \cdot 10^{-10}$  | $3.63 \cdot 10^{-10}$ | $4.01 \cdot 10^{-10}$     | $2.97 \cdot 10^{-9}$  |
| 303   |                       | $2.88 \cdot 10^{-10}$  | $3.06 \cdot 10^{-10}$ | $3.30 \cdot 10^{-10}$     | $2.53 \cdot 10^{-9}$  |
| 308   |                       | $2.44 \cdot 10^{-10}$  | $2.60 \cdot 10^{-10}$ | $2.74 \cdot 10^{-10}$     | $2.16 \cdot 10^{-9}$  |
| 313   |                       | $2.08 \cdot 10^{-10}$  | $2.21 \cdot 10^{-10}$ | $2.29 \cdot 10^{-10}$     | $1.86 \cdot 10^{-9}$  |
| 318   |                       | $1.78 \cdot 10^{-10}$  | $1.90 \cdot 10^{-10}$ | $1.92 \cdot 10^{-10}$     | $1.61 \cdot 10^{-9}$  |
| 323   | $3.93 \cdot 10^{-10}$ | $1.53 \cdot 10^{-10}$  | $1.63 \cdot 10^{-10}$ | $1.62 \cdot 10^{-10}$     | $1.40 \cdot 10^{-9}$  |
| 328   | $3.40 \cdot 10^{-10}$ | $1.32 \cdot 10^{-10}$  | $1.41 \cdot 10^{-10}$ | $1.37 \cdot 10^{-10}$     | $1.22 \cdot 10^{-9}$  |
| 333   | $2.96 \cdot 10^{-10}$ | $1.15 \cdot 10^{-10}$  | $1.23 \cdot 10^{-10}$ | $1.17 \cdot 10^{-10}$     | $1.06 \cdot 10^{-9}$  |
| 338   | $2.58 \cdot 10^{-10}$ | $1.00 \cdot 10^{-10}$  | $1.07 \cdot 10^{-10}$ | $1.00 \cdot 10^{-10}$     | $9.35 \cdot 10^{-10}$ |
| 343   | $2.26 \cdot 10^{-10}$ | $8.79 \cdot 10^{-11}$  | $9.39 \cdot 10^{-11}$ | $8.63 \cdot 10^{-11}$     | $8.25 \cdot 10^{-10}$ |
| 348   | $1.99 \cdot 10^{-10}$ | $7.72 \cdot 10^{-11}$  | $8.26 \cdot 10^{-11}$ | $7.46 \cdot 10^{-11}$     | $7.30 \cdot 10^{-10}$ |
| 353   | $1.76 \cdot 10^{-10}$ | $6.81 \cdot 10^{-11}$  | $7.29 \cdot 10^{-11}$ | $6.47 \cdot 10^{-11}$     | $6.49 \cdot 10^{-10}$ |
| 358   | $1.56 \cdot 10^{-10}$ | $6.03 \cdot 10^{-11}$  | $6.45 \cdot 10^{-11}$ | $5.64 \cdot 10^{-11}$     | $5.78 \cdot 10^{-10}$ |
| 363   | $1.38 \cdot 10^{-10}$ | $5.36 \cdot 10^{-11}$  | $5.74 \cdot 10^{-11}$ | $4.93 \cdot 10^{-11}$     | $5.17 \cdot 10^{-10}$ |
| 368   | $1.23 \cdot 10^{-10}$ | $4.77 \cdot 10^{-11}$  | $5.11 \cdot 10^{-11}$ | $4.33 \cdot 10^{-11}$     | $4.63 \cdot 10^{-10}$ |
| 373   | $1.10 \cdot 10^{-10}$ | $4.27 \cdot 10^{-11}$  | $4.57 \cdot 10^{-11}$ | $3.81 \cdot 10^{-11}$     | $4.17 \cdot 10^{-10}$ |

\*  $T_1$  curve fitted in the range 323–373 K.



**Table S7.**  $^1\text{H}$  and  $^7\text{Li}$  rotational correlation times  $\tau_c$  (s) calculated for  $\text{ChCl:U-LiCl}(1.0)$  using the BPP model.

| T (K) | $\text{U}^*$          | $\text{CH}_2\text{OH}$ | $\text{CH}_2\text{N}$ | $\text{N}(\text{CH}_3)_3$ | Li                    |
|-------|-----------------------|------------------------|-----------------------|---------------------------|-----------------------|
| 298   |                       | $3.11 \cdot 10^{-10}$  | $3.33 \cdot 10^{-10}$ | $3.73 \cdot 10^{-10}$     | $2.31 \cdot 10^{-9}$  |
| 303   |                       | $2.65 \cdot 10^{-10}$  | $2.84 \cdot 10^{-10}$ | $3.10 \cdot 10^{-10}$     | $2.02 \cdot 10^{-9}$  |
| 308   |                       | $2.27 \cdot 10^{-10}$  | $2.43 \cdot 10^{-10}$ | $2.60 \cdot 10^{-10}$     | $1.77 \cdot 10^{-9}$  |
| 313   |                       | $1.95 \cdot 10^{-10}$  | $2.09 \cdot 10^{-10}$ | $2.18 \cdot 10^{-10}$     | $1.56 \cdot 10^{-9}$  |
| 318   |                       | $1.69 \cdot 10^{-10}$  | $1.80 \cdot 10^{-10}$ | $1.85 \cdot 10^{-10}$     | $1.39 \cdot 10^{-9}$  |
| 323   |                       | $1.47 \cdot 10^{-10}$  | $1.56 \cdot 10^{-10}$ | $1.57 \cdot 10^{-10}$     | $1.23 \cdot 10^{-9}$  |
| 328   |                       | $1.28 \cdot 10^{-10}$  | $1.36 \cdot 10^{-10}$ | $1.34 \cdot 10^{-10}$     | $1.10 \cdot 10^{-9}$  |
| 333   | $3.37 \cdot 10^{-10}$ | $1.12 \cdot 10^{-10}$  | $1.19 \cdot 10^{-10}$ | $1.15 \cdot 10^{-10}$     | $9.84 \cdot 10^{-10}$ |
| 338   | $2.89 \cdot 10^{-10}$ | $9.84 \cdot 10^{-11}$  | $1.05 \cdot 10^{-10}$ | $9.94 \cdot 10^{-11}$     | $8.84 \cdot 10^{-10}$ |
| 343   | $2.49 \cdot 10^{-10}$ | $8.68 \cdot 10^{-11}$  | $9.25 \cdot 10^{-11}$ | $8.61 \cdot 10^{-11}$     | $7.96 \cdot 10^{-10}$ |
| 348   | $2.15 \cdot 10^{-10}$ | $7.69 \cdot 10^{-11}$  | $8.19 \cdot 10^{-11}$ | $7.49 \cdot 10^{-11}$     | $7.20 \cdot 10^{-10}$ |
| 353   | $1.87 \cdot 10^{-10}$ | $6.83 \cdot 10^{-11}$  | $7.27 \cdot 10^{-11}$ | $6.54 \cdot 10^{-11}$     | $6.52 \cdot 10^{-10}$ |
| 358   | $1.63 \cdot 10^{-10}$ | $6.09 \cdot 10^{-11}$  | $6.48 \cdot 10^{-11}$ | $5.73 \cdot 10^{-11}$     | $5.93 \cdot 10^{-10}$ |
| 363   | $1.42 \cdot 10^{-10}$ | $5.45 \cdot 10^{-11}$  | $5.79 \cdot 10^{-11}$ | $5.04 \cdot 10^{-11}$     | $5.40 \cdot 10^{-10}$ |
| 368   | $1.25 \cdot 10^{-10}$ | $4.89 \cdot 10^{-11}$  | $5.19 \cdot 10^{-11}$ | $4.45 \cdot 10^{-11}$     | $4.94 \cdot 10^{-10}$ |
| 373   | $1.10 \cdot 10^{-10}$ | $4.40 \cdot 10^{-11}$  | $4.67 \cdot 10^{-11}$ | $3.94 \cdot 10^{-11}$     | $4.52 \cdot 10^{-10}$ |

\*  $\text{T}_1$  curve fitted in the range 333–373 K.

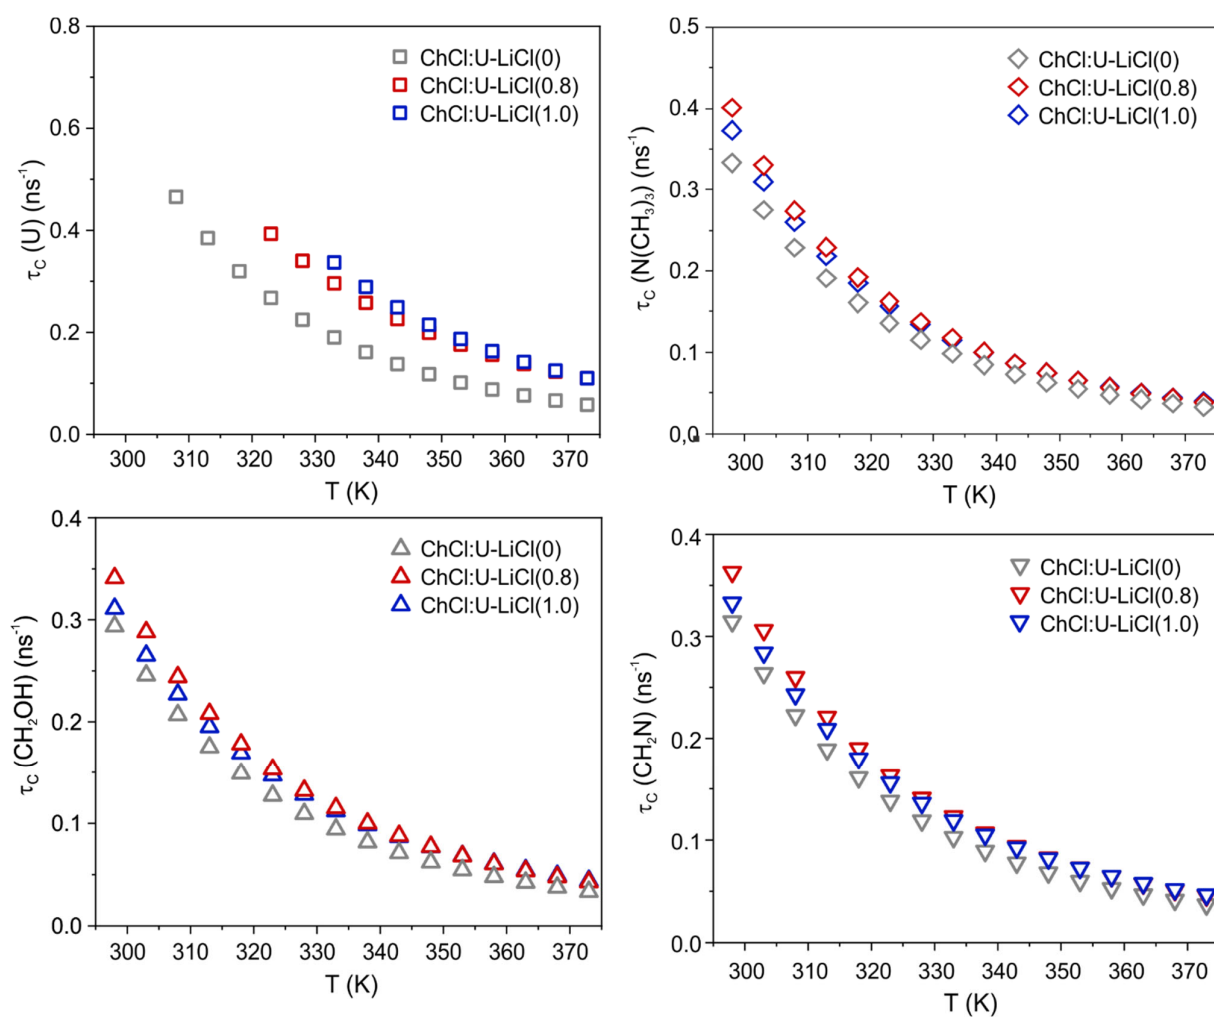

**Figure S4.**  $^1\text{H}$  correlation time  $\tau_c$  calculated as a function of temperature in the samples ChCl:U-LiCl(0) (grey), ChCl:U-LiCl(0.8) (red), and ChCl:U-LiCl(1.0) (blue) for U protons (squares, top, left),  $\text{N}(\text{CH}_3)_3$  protons of Ch (diamonds, top, right),  $\text{CH}_2\text{OH}$  protons of Ch (triangles, bottom, left) and  $\text{CH}_2\text{N}$  protons of Ch (inverted triangles, bottom, right).

---

## References

1. Smith, E.L.; Abbott, A.P.; Ryder, K.S. Deep Eutectic Solvents (DESs) and Their Applications. *Chem. Rev.* **2014**, *114*, 11060–11082.
2. Abranches, D.O.; Martins, M.A.R.; Silva, L.P.; Schaeffer, N.; Pinho, S.P.; Coutinho, J.A.P. Phenolic hydrogen bond donors in the formation of non-ionic deep eutectic solvents: The quest for type v des. *Chem. Commun.* **2019**, *55*, 10253–10256.
